# Supplementary material for: Synthesis and properties of quaternary ammonium surfactants containing a methoxy benzyl substitute
Source: Royal Society of Chemistry journal article supplement (doi:10.1039/c4ra07363k), 2014-01-01

## Appendix A FT-IR of DHBA-m

### FT IR of m-MDRA-12

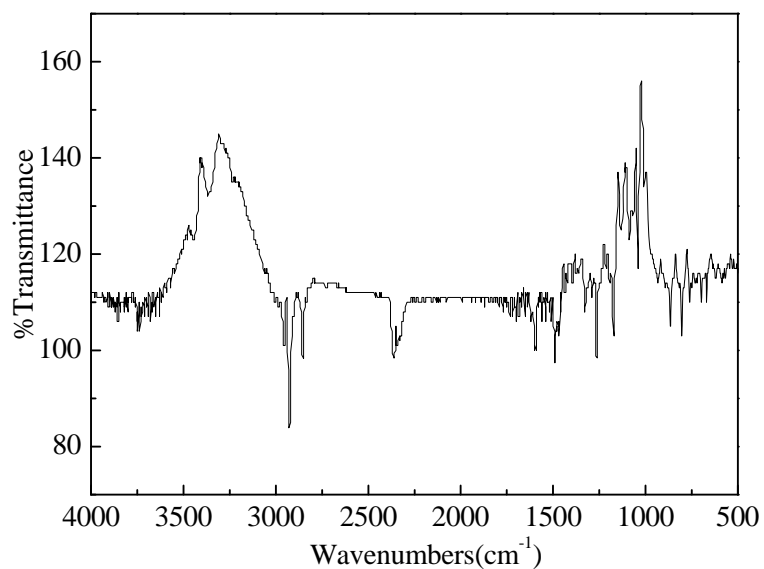

### FT IR of m-MDRA-14

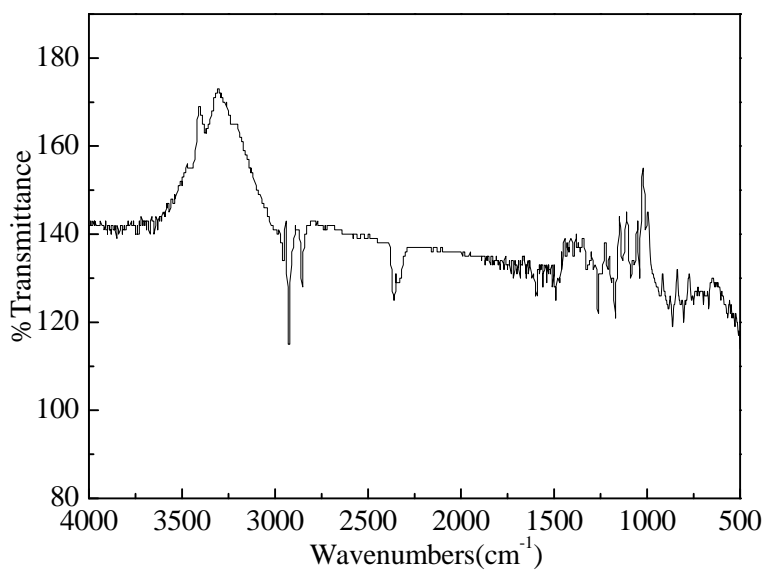

### FT IR of m-MDRA-16

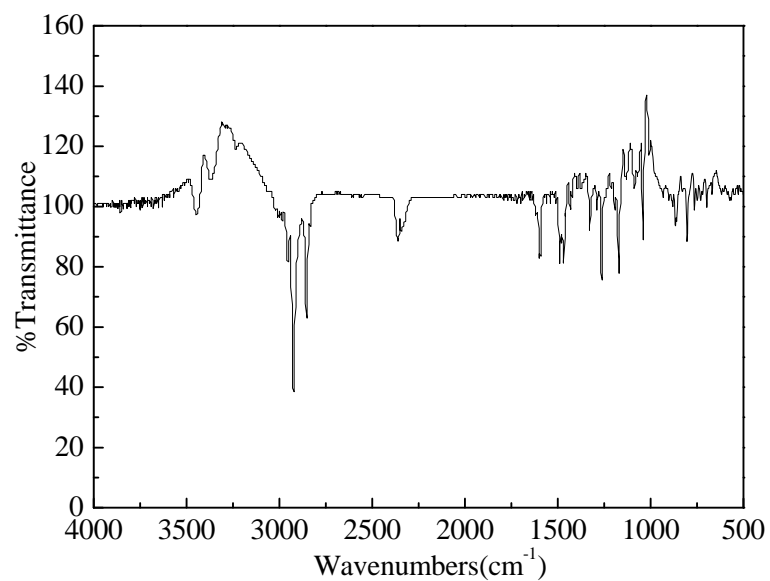

### FT IR of m-MDRA-18

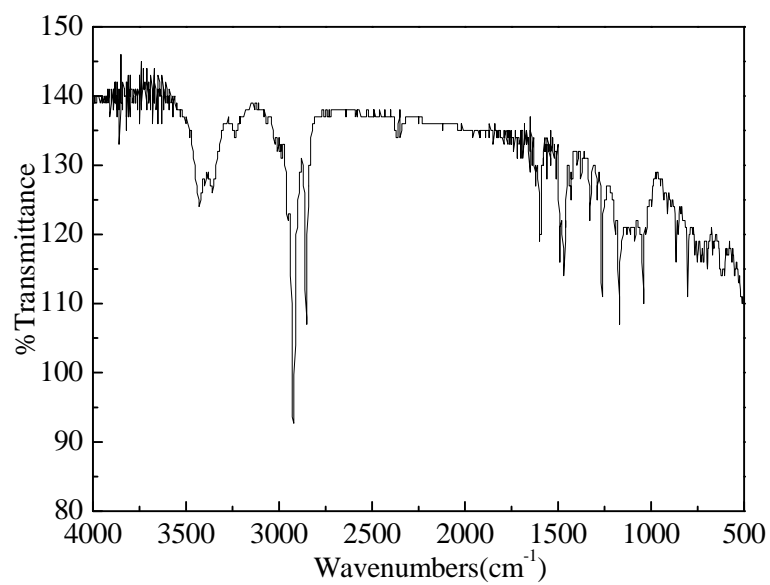

## Appendix B $^1\text{H}$ NMR of DHBA-m

### $^1\text{H}$ NMR of m-MDRA-12

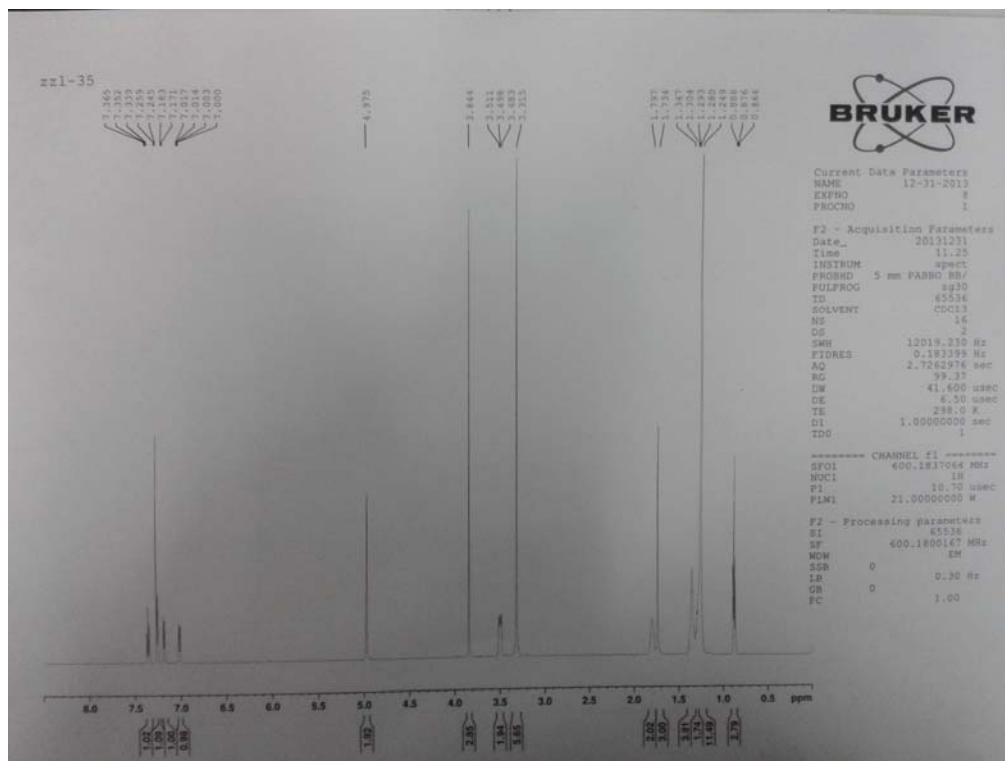

### $^1\text{H}$ NMR of m-MDRA-14

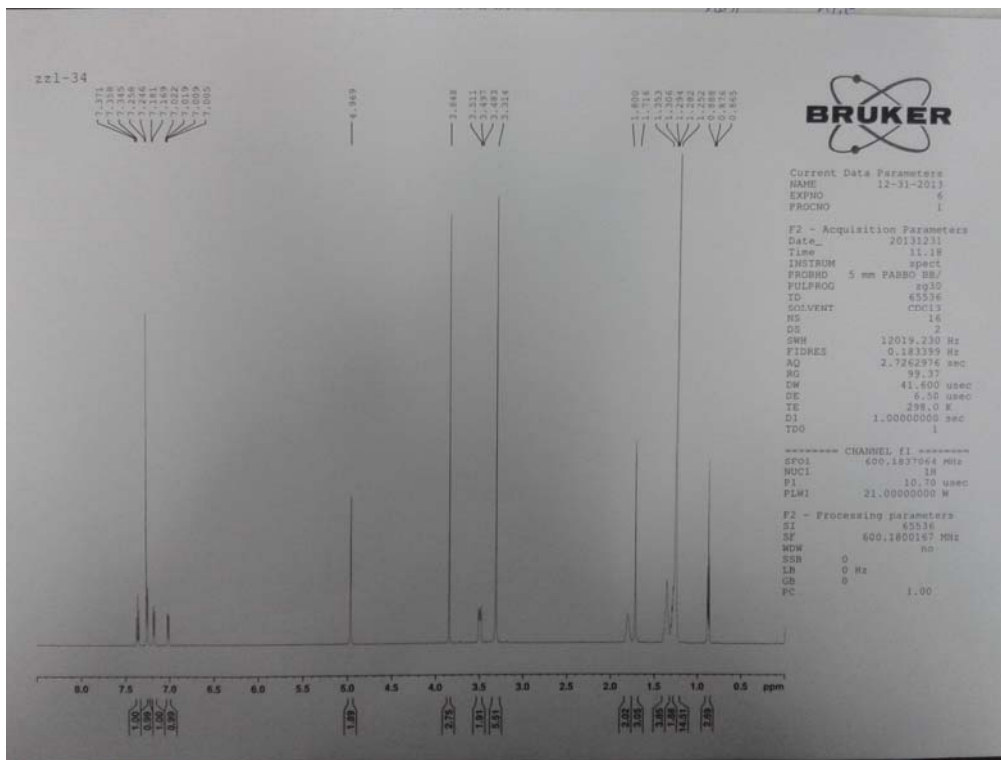

### <sup>1</sup>H NMR of m-MDRA-16

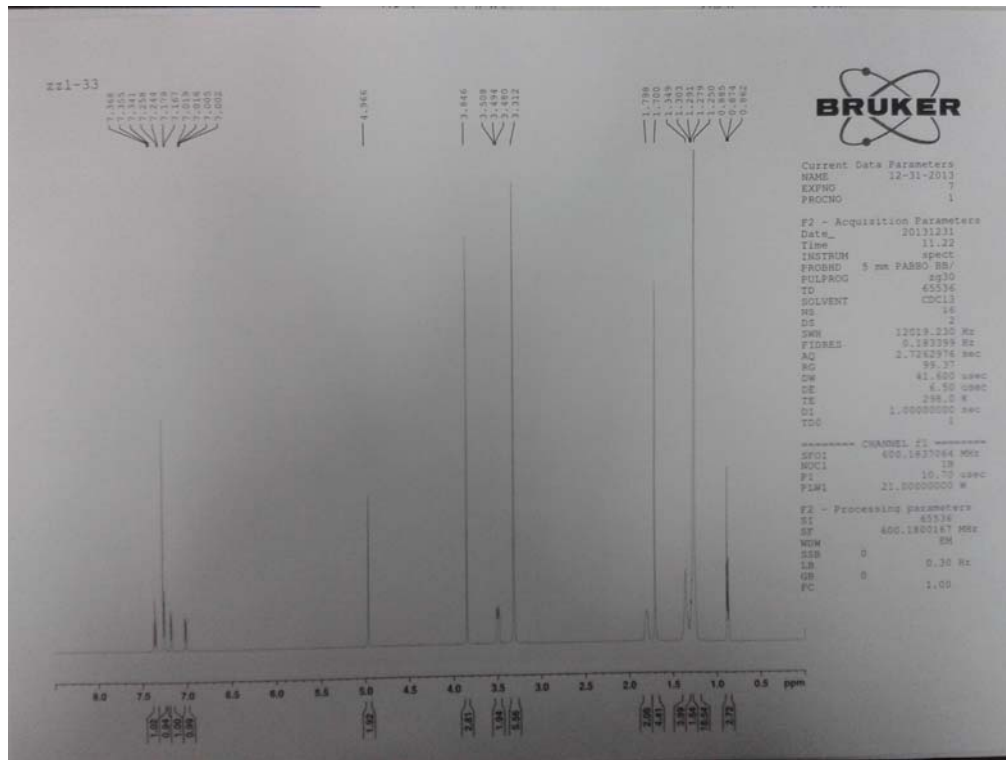

### <sup>1</sup>H NMR of m-MDRA-18

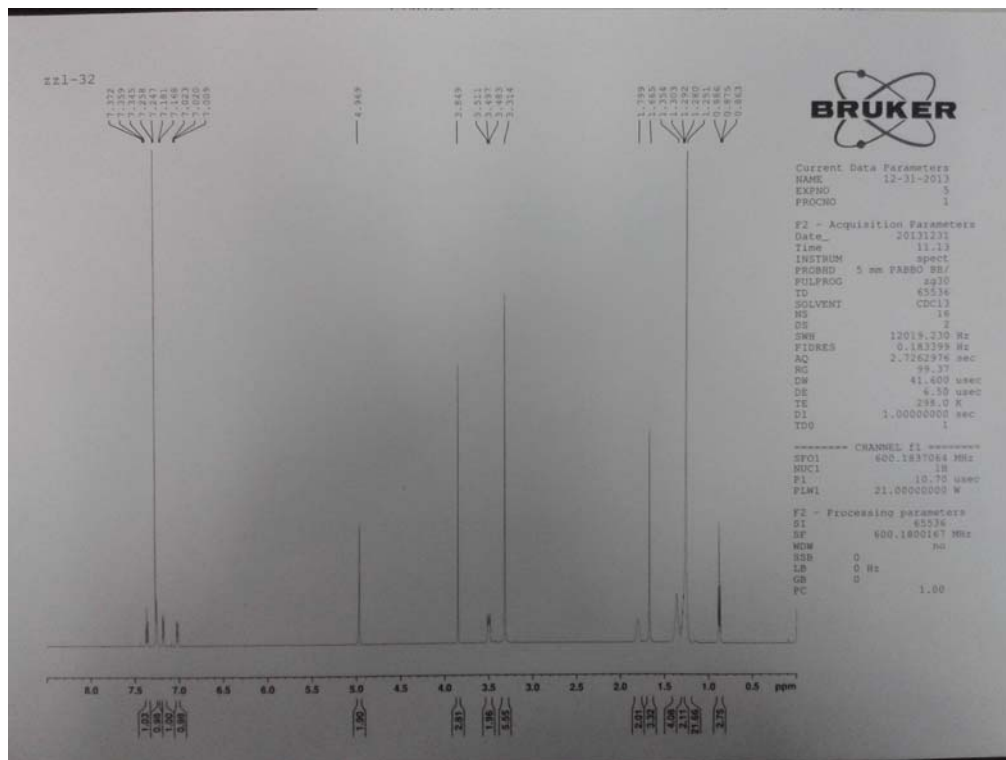

# <sup>13</sup>C NMR of m-MDRA-12

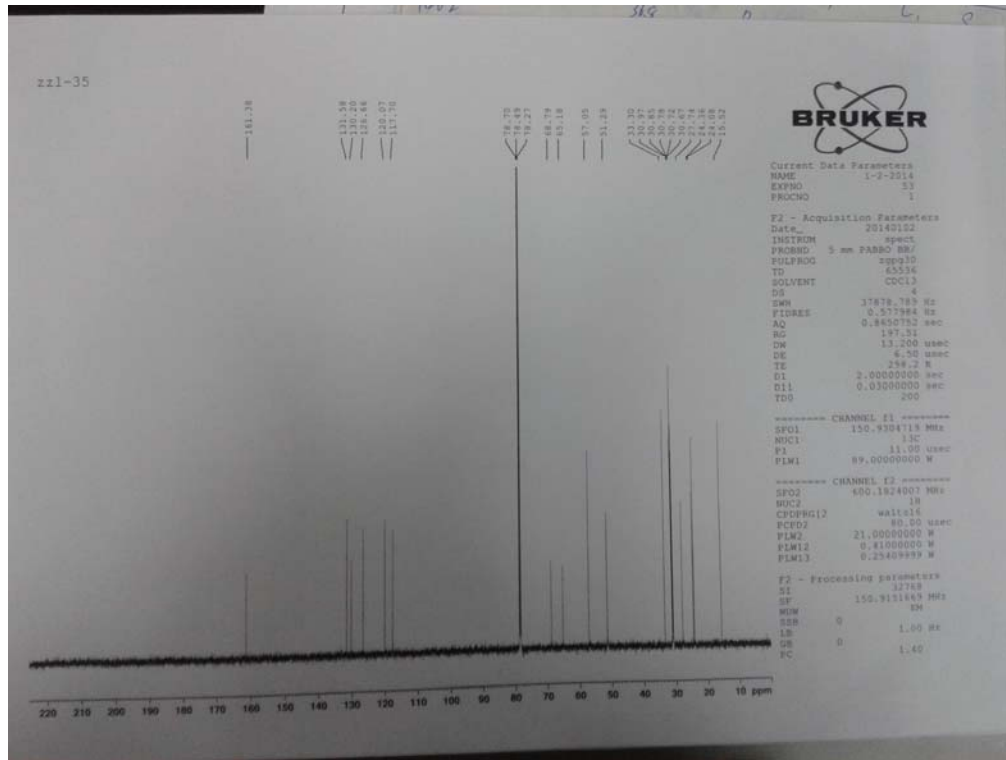

# <sup>13</sup>C NMR of m-MDRA-14

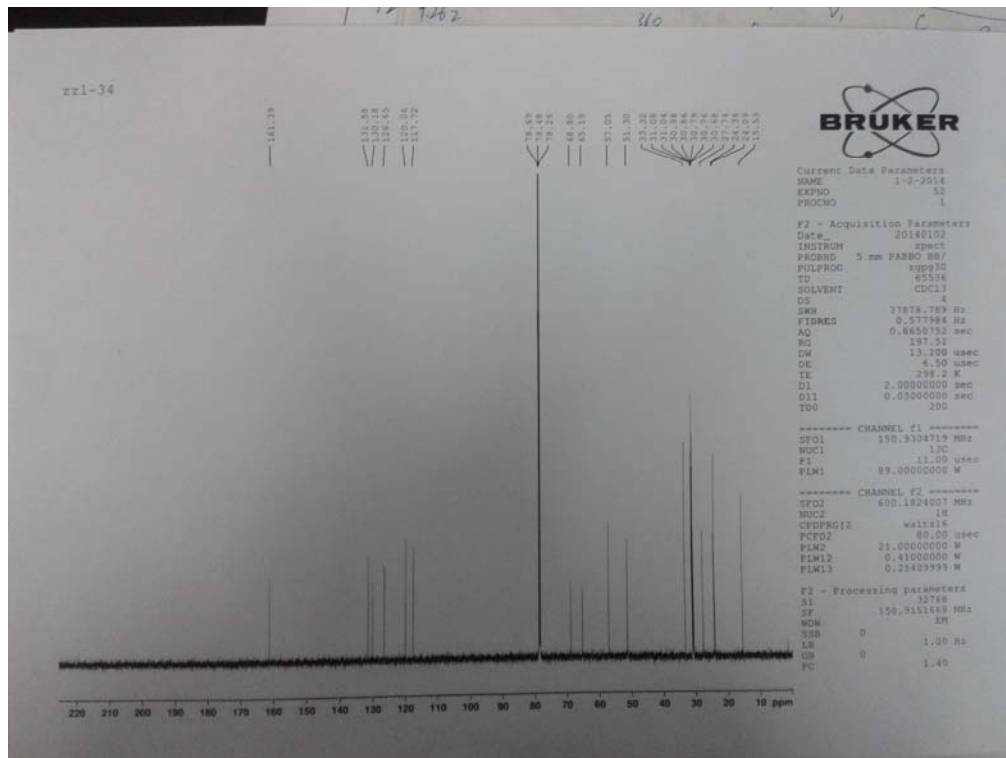

### <sup>13</sup>C NMR of m-MDRA-16

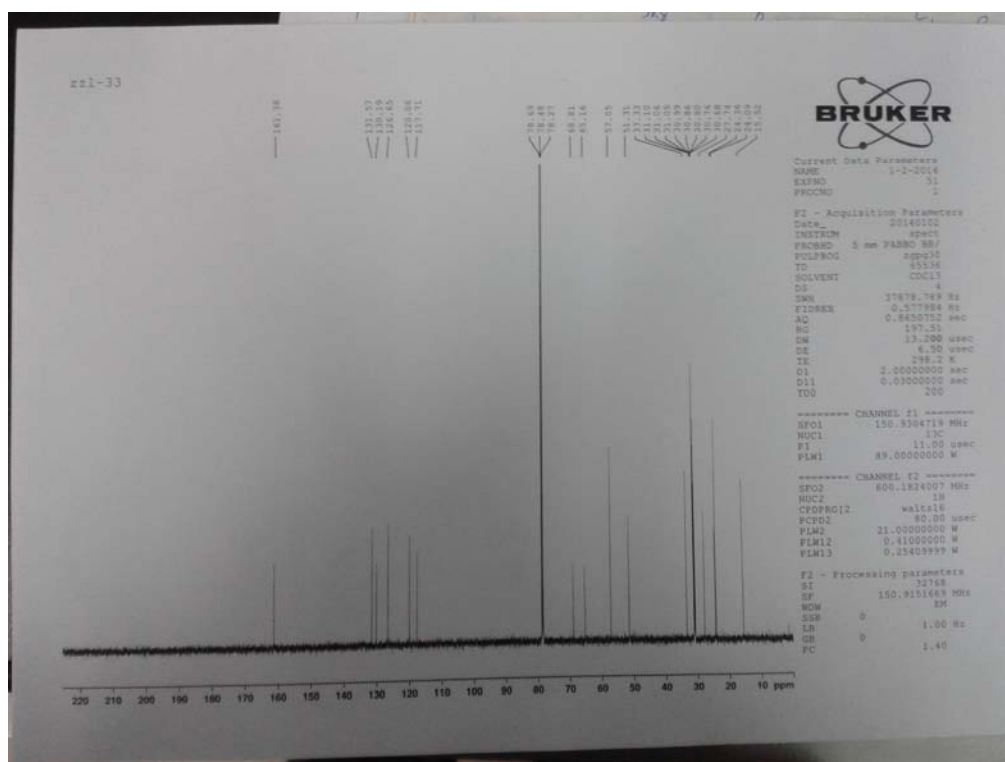

### <sup>13</sup>C NMR of m-MDRA-18

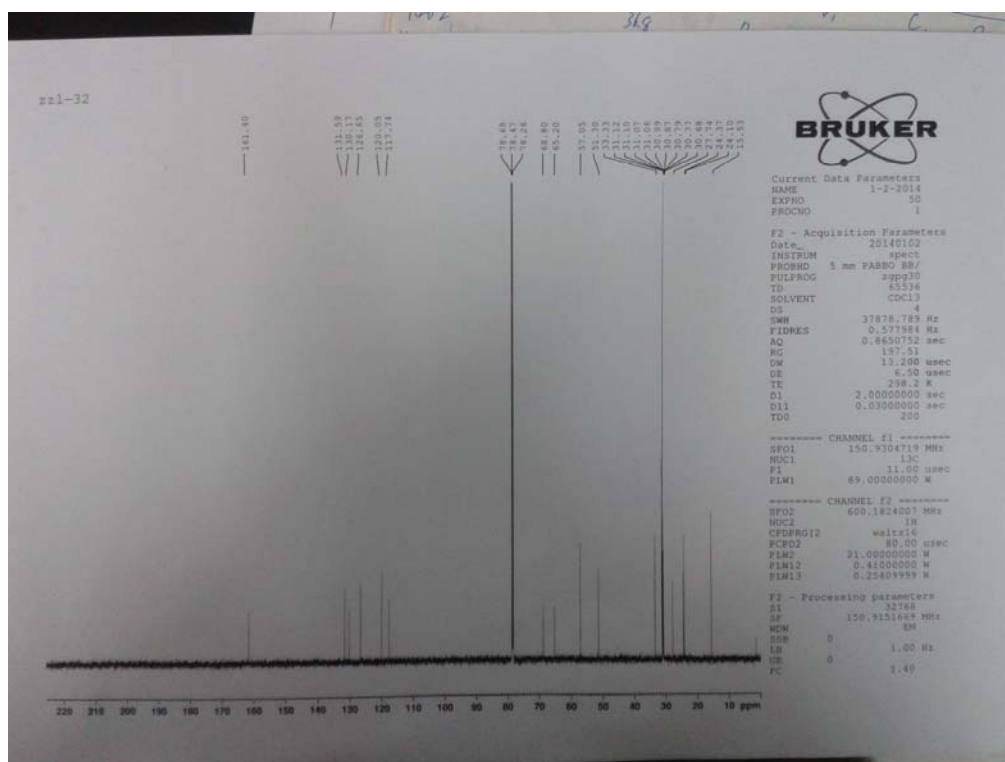

# Appendix MS of DHBA-m

## MS of m-MDRA-12

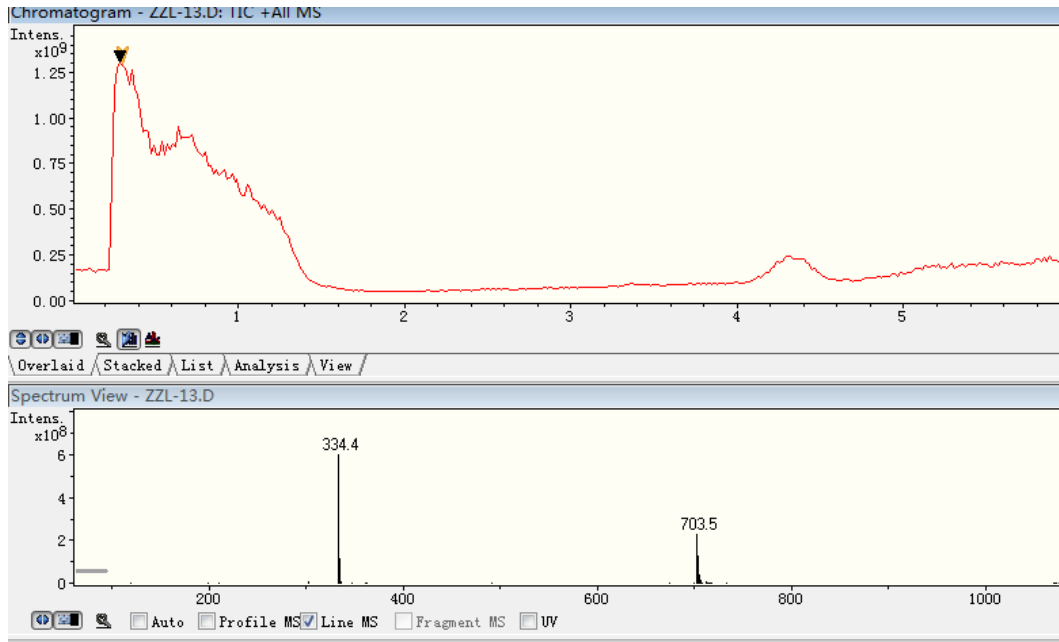

## MS of m-MDRA-14

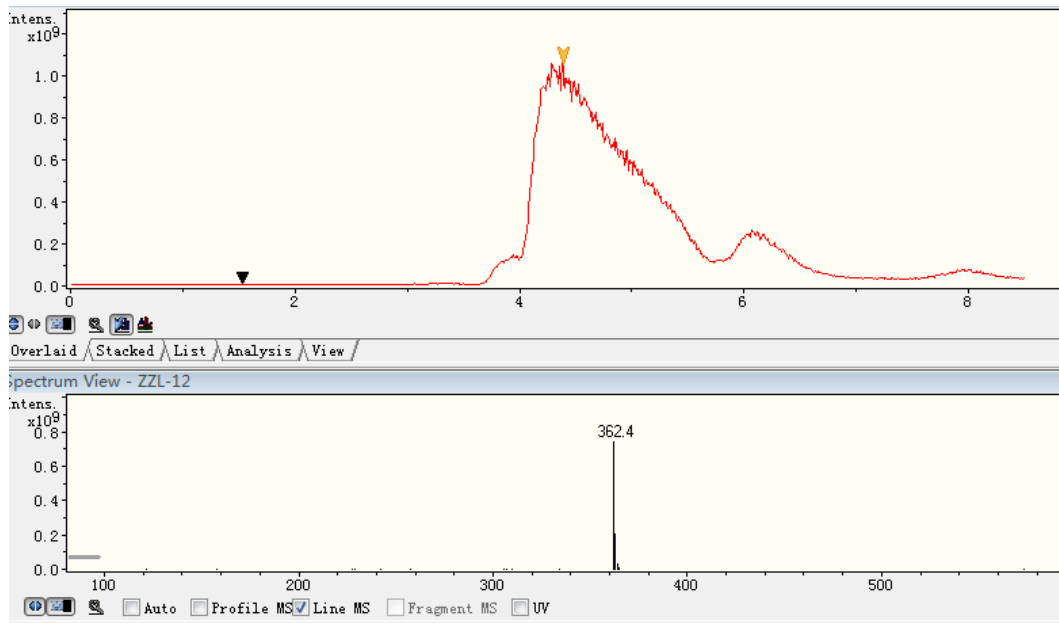

### MS of m-MDRA-16

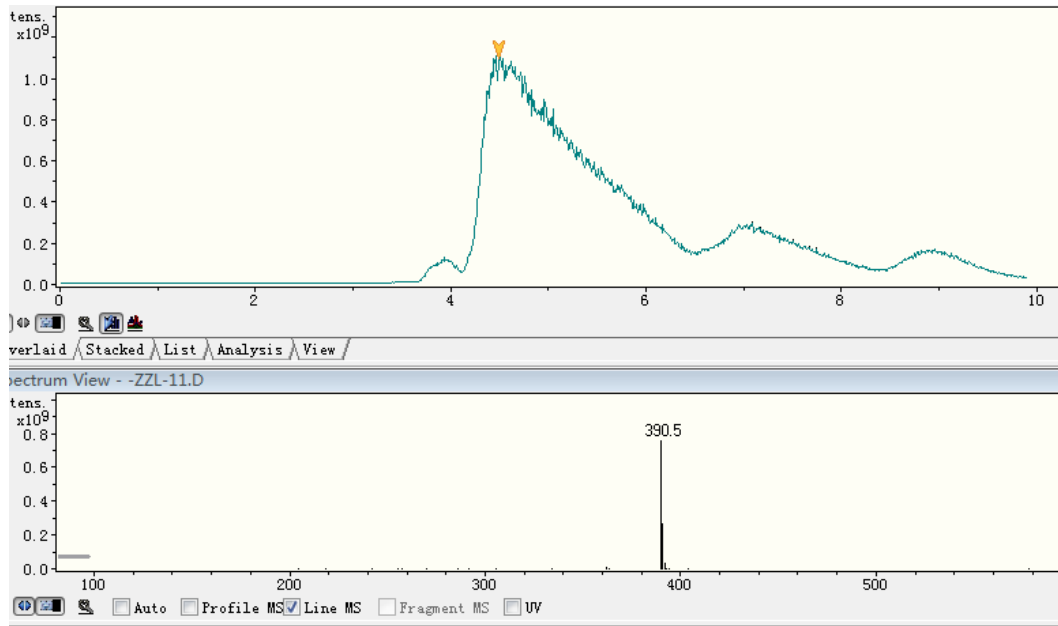

### MS of m-MDRA-18

zzl27 577 (1.214) Cm (526:606)

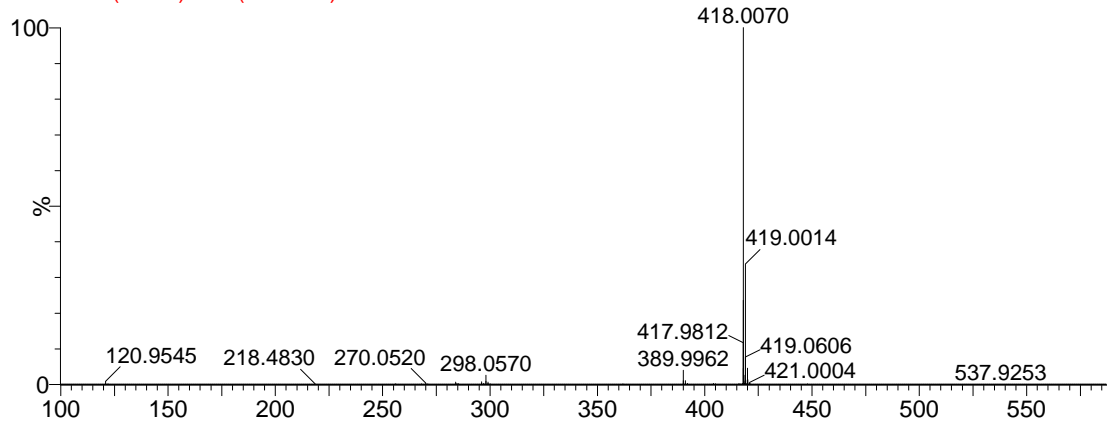

Supplement: c4ra07363k1.pdf [file c4ra07363k1.pdf]
